# Supplementary material
Source: MDPI journal article supplement (https://www.mdpi.com/2571-550X/5/3/37)
Supplement: s1 [file s1]

## Supplementary information:

# Mid–late Quaternary fluvial archives near the margin of MIS 12 glaciation in southern East Anglia, UK: amalgamation of multi-disciplinary and citizen-science data sources.

Peter Allen<sup>1</sup>, David R. Bain<sup>2</sup>, David R. Bridgland<sup>3</sup> \*, Paul Buisson<sup>4</sup>, Jan-Pieter Buylaert<sup>5</sup>, Rachel Bynoe<sup>6</sup>, William H. George<sup>7</sup>, B. Andrew Haggart<sup>8</sup>, David J. Horne<sup>9,10</sup>, Ellen-May Littlewood<sup>11</sup>, Alan Lord<sup>12</sup>, Anna C. March<sup>9</sup>, Ian Mercer<sup>13</sup>, Rosalind Mercer<sup>13</sup>, Andrew S. Murray<sup>14</sup>, Kirsty E.H. Penkman<sup>15</sup>, Richard C. Preece<sup>16</sup>, John Ratford<sup>17</sup>, Danielle C. Schreve<sup>18</sup>, Andrew Snelling<sup>19</sup>, Kadri Sohar<sup>20</sup>, John Whittaker<sup>10</sup>, Mark J. White<sup>21</sup>, Tom S. White<sup>22</sup>

<sup>1</sup> 13 Churchgate, Cheshunt, Hertfordshire, EN8 9NB, UK

<sup>2</sup> Ricebridge Orchard, Harwich Rd, Thorpe le Soken, Essex, CO 16 0HL, UK

<sup>3</sup> Department of Geography, Durham University, Durham, DH1 3LE, UK

<sup>4</sup> 26 Eastcliff Avenue, Clacton-on-Sea, Essex, CO15 5AR, UK

<sup>5</sup> Department of Physics, Technical University of Denmark, DTU Risø campus, Roskilde, Denmark

<sup>6</sup> Department of Archaeology, University of Southampton, Southampton, SO14 1BF, UK

<sup>7</sup> 11 Sterry Road, Barking, IG11 9SJ, UK

<sup>8</sup> School of Science, The University of Greenwich at Medway, Chatham, Kent, ME4 4TB, UK

<sup>9</sup> School of Geography, Queen Mary, University of London, London E1 4NS, UK

<sup>10</sup> Department of Earth Sciences, Natural History Museum, London, SW7 2BD, UK

<sup>11</sup> 20 Sherburn Road, Gilesgate, Durham, DH1 2JR, UK

<sup>12</sup> Senckenberg Forschungsinstitut Frankfurt, Senckenberganlage 25, D-60325 Frankfurt-am-Main, Germany

<sup>13</sup> 2A Hearsall Ave., Broomfield, Essex, CM1 7DD, UK

<sup>14</sup> Nordic Laboratory for Luminescence Dating, Department of Geoscience, Aarhus University, DTU Risø campus, Roskilde, Denmark.

<sup>15</sup> Department of Chemistry, University of York, York, YO10 5DD, UK

<sup>16</sup> Department of Zoology, University of Cambridge, Cambridge, CB2 3EJ, UK

<sup>17</sup> 34 Clarendon Park, Clacton-on-Sea, Essex, CO15 6NT, UK

<sup>18</sup> Department of Geography, Royal Holloway, University of London, Egham, Surrey TW20 0EX, UK

<sup>19</sup> Silver Drive, Aldeburgh, Suffolk, IP15 5JZ, UK

<sup>20</sup> Department of Geology, University of Tartu, Ravila 14a, 50411 Tartu, Estonia

<sup>21</sup> Department of Archaeology, Durham University, Durham, DH1 3LE, UK

<sup>22</sup> Department of Life Sciences, Natural History Museum, London, SW7 2BD, UK

\* Correspondence: d.r.bridgland@durham.ac.uk

## SUPPLEMENTARY FILE – ADDITIONAL DATA TABLES

Contents:

Table S1 16–32 mm Clast-lithological data from the unglaciated periphery of southern East Anglia

Table S2. Fossil material recovered during deep piling of the Clacton Channel Deposits at Victory Court, Nelson Rd, in 2006 (compiled by J. Whittaker).

Table S1 16–32 mm Clast-lithological data from the unglaciated periphery of southern East Anglia: Sources: [9–11,31]; also D.R. Bridgland, unpublished. **Data from sites discussed in this paper are in red font.**

**Table S1.** 16–32 mm Clast-lithological data from the unglaciated periphery of southern East Anglia.

| Locality & no.                                                                                                                     | flint   |                      |        |       | chert |      |          | quartz/ |         | other | Non <sup>2</sup><br>durables | TOTAL |
|------------------------------------------------------------------------------------------------------------------------------------|---------|----------------------|--------|-------|-------|------|----------|---------|---------|-------|------------------------------|-------|
|                                                                                                                                    | nodular | rounded <sup>1</sup> | broken | total | Gsd   | Carb | Rhaxella | qtzite  | igneous |       |                              |       |
| Post-Anglian river gravels (Essex rivers - B = Blackwater <sup>3</sup> ; Co = Colne; H = Holland Brook; M = Mill River; S = Stour) |         |                      |        |       |       |      |          |         |         |       |                              |       |
| E.Mersea 1 B                                                                                                                       | 12.7    | 35.4                 | 3.1    | 85.2  | 7.6   | 0.3  | 0.3      | 6.6     |         |       | 0.5                          | 393   |
| Restaurant 2 B                                                                                                                     | 12.9    | 42.2                 | 3.3    | 83.7  | 6.2   | 1.1  | 0.2      | 8.0     | 0.2     | 0.8   | 0.6                          | 630   |
| Tollesbury 1A B                                                                                                                    | 12.9    | 37.8                 | +      | 83.6  |       | 1.6  | 0.1      | 12.9    | 0.6     | 1.1   |                              | 805   |
| Brightlingsea 1 Co                                                                                                                 | 12.9    | 26.4                 | 4.7    | 80.5  | 0.3   | 1.9  |          | 19.2    |         | 0.3   |                              | 364   |
| U. Dovercourt 1 S                                                                                                                  | 14.5    | 29.5                 | 4.6    | 80.2  | 0.7   | 1.5  | 0.2      | 16.9    | 0.5     | 0.2   |                              | 414   |
| U. Dovercourt 2 S                                                                                                                  | 12.1    | 30.3                 | 7.4    | 79.2  | 2.1   | 1.6  |          | 14.5    | 1.1     | 1.1   |                              | 379   |
| Daking's Pit 1 H <sup>4</sup>                                                                                                      | 17.1    | 25.8                 | 4.0    | 82.5  | 1.1   | 1.8  |          | 13.1    | 0.7     | 0.7   |                              | 275   |
| Daking's Pit 2 H <sup>4</sup>                                                                                                      | 16.3    | 21.1                 | 7.3    | 81.9  | 0.9   | 2.1  | 0.6      | 12.1    | 0.6     | 0.6   |                              | 331   |
| Foxhall Rd M                                                                                                                       | 10.7    | 27.6                 | 7.7    | 73.3  |       | 0.8  | 0.3      | 24.4    |         | 1.1   |                              | 373   |
| Post-diversion Thames–Medway: Wigborough Gravel (including Clacton Channel Gravel)                                                 |         |                      |        |       |       |      |          |         |         |       |                              |       |
| Butlins Section B                                                                                                                  | 13.3    | 47.3                 | 4.1    | 88.8  | 6.5   | 0.7  |          | 3.7     |         | 0.3   | 3.4                          | 294   |
| Clacton Nelson Rd 1                                                                                                                | 12.1    | 25.2                 | 4.0    | 76.0  | 23.4  | 0.3  |          |         |         |       |                              | 321   |
| West Cliff 4A                                                                                                                      | 10.5    | 45.0                 | 4.0    | 89.1  | 8.1   | 0.7  |          | 1.8     |         | 0.3   |                              | 742   |
| West Cliff 4B                                                                                                                      | 8.1     | 41.0                 | 2.7    | 83.8  | 13.4  | 1.3  |          | 1.3     |         | 0.9   |                              | 456   |
| West Cliff 4C <sup>5</sup>                                                                                                         | 15.2    | 33.9                 | 4.6    | 81.3  | 8.4   | 1.2  | 0.7      | 7.6     |         | 0.7   |                              | 433   |
| West Cliff 4D <sup>5</sup>                                                                                                         | 12.6    | 38.7                 | 4.5    | 81.5  | 5.3   | 2.0  | 0.3      | 9.2     | 0.3     | 1.7   | 0.3                          | 357   |
| Lion Point 1                                                                                                                       | +       | 28.2                 | +      | 79.2  | 17.8  | 0.3  |          | 2.7     |         |       | 3.5                          | 259   |
| Lion Point 2                                                                                                                       | 9.8     | 42.3                 | +      | 86.9  | 8.9   | 0.3  |          | 3.4     |         | 0.7   | 4.6                          | 305   |
| Anglian glacial gravels                                                                                                            |         |                      |        |       |       |      |          |         |         |       |                              |       |
| Denham Castle 1                                                                                                                    | 34.3    | 0.4                  | 26.7   | 93.2  |       | 0.9  | 0.4      | 3.8     | 0.9     | 0.9   | 103.0                        | 236   |
| Ingham 1                                                                                                                           | 37.5    | 2.3                  | 18.9   | 90.9  |       | 0.8  | 0.4      | 5.7     | 0.4     | 1.9   | 33.7                         | 264   |
| Fingringhoe 1A <sup>6</sup>                                                                                                        | 13.0    | 15.4                 | 8.4    | 80.8  | 2.4   | 4.1  | 1.4      | 8.4     | 0.8     | 1.6   |                              | 369   |
| Fingringhoe 1B                                                                                                                     | 13.7    | 15.9                 | 6.6    | 81.7  | 0.7   | 1.3  | 1.1      | 12.6    | 0.9     | 1.8   |                              | 453   |
| Valley Farm                                                                                                                        | +       | 16.7                 | +      | 70.7  | 0.7   | 1.3  | 0.2      | 17.1    | 0.7     | 3.7   | 2.2                          | 461   |
| Ipswich Airport                                                                                                                    | +       | 20.5                 | +      | 77.6  | 0.4   | 2.5  | 0.6      | 15.4    | 0.4     | 3.5   | 1.9                          | 513   |
| Kesgrave                                                                                                                           | +       | 18.7                 | +      | 66.6  | 0.6   | 0.2  | 0.2      | 31.2    | 0.2     | 1.4   |                              | 491   |
| Tuddenham                                                                                                                          | +       | 14.8                 | +      | 68.6  |       | 0.8  | 0.8      | 18.6    | 0.8     | 10.8  | 9.7                          | 370   |
| Upper Holland Gravel                                                                                                               |         |                      |        |       |       |      |          |         |         |       |                              |       |
| Holland-on-Sea 1                                                                                                                   | 9.7     | 15.5                 | +      | 70.7  | 24.5  | 1.5  | 0.5      | 2.4     |         | 0.5   | 1.2                          | 413   |
| Holland-on-Sea 2A                                                                                                                  | 9.0     | 15.7                 | 4.9    | 68.9  | 25.1  | 0.7  |          | 3.7     | 0.4     | 1.1   |                              | 267   |
| Holland-on-Sea 2B <sup>7</sup>                                                                                                     | 13.5    | 23.7                 | 5.2    | 71.3  | 15.9  | 1.4  | 0.2      | 10.0    |         | 1.2   | 0.5                          | 422   |
| Pre-diversion Thames–Medway: Lower Holland Gravel                                                                                  |         |                      |        |       |       |      |          |         |         |       |                              |       |
| St Osyth 6                                                                                                                         | 16.0    | 29.5                 | 4.7    | 81.2  | 2.5   | 1.3  |          | 14.4    |         | 0.3   |                              | 319   |
| Bush Paddock                                                                                                                       | 10.5    | 43.3                 | +      | 83.9  | 5.0   | 0.8  |          | 9.6     | 0.3     | 0.5   |                              | 647   |
| Holland-on-Sea 2C                                                                                                                  | 11.9    | 32.8                 | 3.6    | 80.6  | 2.2   | 1.0  |          | 15.5    | 0.2     | 0.5   |                              | 412   |
| Holland-on-Sea 2D                                                                                                                  | 13.9    | 26.7                 | 6.7    | 81.5  | 2.0   | 1.1  |          | 14.8    | 0.3     | 0.3   | 0.2                          | 655   |
| Pre-diversion Thames–Medway: Cooks Green Gravel                                                                                    |         |                      |        |       |       |      |          |         |         |       |                              |       |
| Cooks Green 1A                                                                                                                     | +       | 21.3                 | +      | 83.8  | 3.2   | 1.0  |          | 13.0    | 0.5     | 1.3   |                              | 625   |
| Cooks Green 1B                                                                                                                     | 14.4    | 27.2                 | +      | 84.2  | 2.0   | 2.8  |          | 13.8    |         | 0.4   |                              | 492   |
| Cooks Green 2                                                                                                                      | 12.7    | 29.4                 | +      | 83.0  | 3.3   | 0.3  |          | 13.5    | 0.3     | 0.8   |                              | 394   |
| Great Holland 1                                                                                                                    | 19.1    | 25.5                 | +      | 84.0  | 1.7   | 0.7  |          | 14.3    |         | 1.0   |                              | 419   |
| Weeley Heath 1                                                                                                                     | 12.6    | 28.8                 | 6.0    | 82.1  | 10.6  | 1.0  |          | 5.6     | 0.3     | 0.3   |                              | 302   |
| Weeley Heath 2A                                                                                                                    | 18.5    | 27.2                 | 5.5    | 79.1  | 1.3   | 2.4  |          | 14.9    | 0.8     | 1.6   |                              | 383   |
| Weeley Heath 2B                                                                                                                    | 14.5    | 27.3                 | 5.2    | 77.3  | 18.0  |      |          | 2.3     |         | 1.7   | 42.4                         | 172   |
| Weeley Heath 3                                                                                                                     | 13.8    | 49.1                 | 3.5    | 83.6  | 14.3  |      |          |         |         | 1.7   | 68.1                         | 116   |

| Locality & no.                              | flint   |                      |        |       | chert |      |          | quartz/ |         |       | Non <sup>2</sup><br>durables | TOTAL |
|---------------------------------------------|---------|----------------------|--------|-------|-------|------|----------|---------|---------|-------|------------------------------|-------|
|                                             | nodular | rounded <sup>1</sup> | broken | total | Gsd   | Carb | Rhaxella | qtzite  | igneous | other |                              |       |
| Pre-diversion Thames–Medway: Oakley Gravel  |         |                      |        |       |       |      |          |         |         |       |                              |       |
| Little Oakley KA                            | 15.5    | 30.3                 | 5.2    | 80.2  | 2.0   | 0.6  | 0.2      | 15.8    | 0.3     | 0.9   |                              | 653   |
| Dovercourt DA                               | 12.1    | 30.3                 | 7.4    | 79.2  | 2.1   | 1.6  |          | 14.5    | 1.1     | 1.6   |                              | 379   |
| Pre-diversion Thames: Lower St Osyth Gravel |         |                      |        |       |       |      |          |         |         |       |                              |       |
| Fingringhoe 1C                              | 12.5    | 31.4                 | 3.5    | 85.1  |       | 2.1  |          | 12.8    |         |       |                              | 376   |
| Big Wapping Hill <sup>8</sup> 3             | 13.1    | 31.8                 | 3.0    | 77.5  | 0.6   | 1.3  |          | 19.2    | 0.7     | 0.7   |                              | 994   |
| St Osyth 1A                                 | +       | 35.4                 | +      | 77.1  | 0.5   | 2.0  |          | 18.8    | 0.2     | 1.6   |                              | 559   |
| St Osyth 1B                                 | +       | 30.6                 | +      | 79.8  | 1.6   | 1.3  |          | 15.5    | 0.7     | 1.3   | 0.5                          | 748   |
| Pre-diversion Thames: Wivenhoe Gravel       |         |                      |        |       |       |      |          |         |         |       |                              |       |
| Wivenhoe 1B                                 | 17.8    | 25.1                 | 3.0    | 80.1  | 0.8   | 2.7  |          | 15.1    | 0.3     | 1.1   |                              | 371   |
| Wivenhoe 2A                                 | 14.1    | 30.4                 | 4.6    | 74.6  | 0.7   | 1.4  |          | 22.6    | 0.4     | 0.4   |                              | 283   |
| Arlesford 2                                 | 16.6    | 21.2                 | 3.4    | 81.4  | 0.9   | 1.4  |          | 27.6    | 0.6     | 1.7   |                              | 349   |
| Pre-diversion Thames: Ardleigh Gravel       |         |                      |        |       |       |      |          |         |         |       |                              |       |
| Ardleigh 1                                  | 15.4    | 26.8                 | 3.2    | 75.6  | 0.7   | 0.8  |          | 19.3    | 1.5     | 2.2   |                              | 590   |
| Ardleigh 2                                  | 19.2    | 23.7                 | 4.7    | 80.0  | 1.5   | 2.0  |          | 14.6    |         | 1.1   |                              | 615   |
| Ardleigh 4A                                 | 12.7    | 33.3                 | 2.2    | 72.0  | 0.4   | 1.1  |          | 25.3    | 0.9     | 0.2   |                              | 553   |
| Ardleigh 4B                                 | 13.0    | 29.3                 | 2.5    | 75.4  | 1.3   | 1.1  |          | 19.2    | 1.1     | 1.6   |                              | 447   |
| Pre-diversion Thames: Waldringfield Gravel  |         |                      |        |       |       |      |          |         |         |       |                              |       |
| Mistley Heath 1                             | 13.7    | 26.3                 | +      | 82.7  | 1.6   | 1.6  |          | 18.6    |         |       |                              | 365   |
| Ipswich Airport                             | +       | 17.2                 | +      | 86.3  | 0.9   | 0.9  |          | 9.3     | 0.4     | 2.2   |                              | 226   |
| Kesgrave                                    | +       | 24.5                 | +      | 84.1  | 1.3   | 1.3  |          | 11.9    |         |       |                              | 151   |
| Foxhall Heath                               | +       | 15.9                 | +      | 78.9  | 1.3   | 1.1  |          | 18.0    |         | 0.8   |                              | 473   |
| Waldringfield Upper                         | +       | 21.6                 | +      | 80.6  | 1.4   | 1.2  |          | 16.3    | 0.2     | 0.4   |                              | 509   |
| Waldringfield Lower                         | +       | 17.7                 |        | 77.9  | 1.6   | 1.5  |          | 18.0    | 0.2     | 0.8   |                              | 611   |
| Trimley                                     | +       | 33.7                 |        | 86.1  | 1.0   | 0.2  | 0.2      | 11.5    | 0.2     | 0.8   |                              | 504   |
| Kirton                                      | +       | 28.6                 |        | 84.6  | 2.1   | 1.3  |          | 10.3    | 0.4     | 1.3   |                              | 234   |

**Notes:**

+ - not separately recorded

1 - In most samples rounded flint is derived entirely from the Palaeogene of the London Basin

2 - Non durables (chalk, limestones, calcareous fossils, claystone, soft ironstones and sandstones) are excluded from totals and expressed as % total durable material

3 - Blackwater, East Mersea Restaurant Gravel samples: No.1 is from the Restaurant Site, No.2 is from the Hippopotamus Site (see Bridgland, 1994)

4 - Also possible that this is Cooks Green Formation

5 - Samples from below the feather-edge of the Clacton Channel Deposits. Could also be Lower Holland Gravel (see Bridgland et al., 1988)

6 - The gravel at Fingringhoe is interpreted as distal outwash, with material introduced from non-glacial sources by tributary rivers (see Bridgland, 1994)

7 - Sample transitional between Lower Holland Gravel and Upper Holland Gravel (see Bridgland et al., 1988; Bridgland, 1994)

8 - Also called 'Moverons'

Abbreviations: Gsd = Greensand (chert + other lithologies; Carb. = Carboniferous chert; Rhaxella = Rhaxella chert (Portlandian/Oxfordian); qtzite = quartzites (sedimentary and metamorphic)

**Table S2.** Fossil material recovered during deep piling of the Clacton Channel Deposits at Victory Court, Nelson Rd, in 2006 (compiled by J. Whittaker). .

| SAMPLE                         | 1     | 2    | 3    | 4    | 5   | 6    |
|--------------------------------|-------|------|------|------|-----|------|
| Piling depth (m.)              | 1.0   | 2.0  | 3.0  | 4.0  | 5.0 | 10.0 |
| Height O.D.                    | +10.0 | +9.0 | +8.0 | +7.0 | 6.0 | +1.0 |
| <b>Brackish foraminifera:</b>  |       |      |      |      |     |      |
| <i>Ammonia</i> sp.             | xxx   |      | xx   | xxx  | xxx | xx   |
| <i>Haynesina germanica</i>     | x     |      |      |      |     | o    |
| <b>Brackish ostracods:</b>     |       |      |      |      |     |      |
| <i>Cyprideis torosa</i>        | x     |      |      | x    | x   | x    |
| <i>Cytheromorpha fuscata</i>   |       |      |      | x    | xx  | x    |
| <i>Loxoconcha elliptica</i>    |       |      |      |      |     | x    |
| <b>Freshwater ostracods:</b>   |       |      |      |      |     |      |
| <i>Cytherissa lacustris</i>    |       | o    |      |      | o   |      |
| <i>Candona</i> sp. (juveniles) |       | o    |      |      | o   |      |
| <i>Darwinula stevensoni</i>    |       |      |      | x    | o   | x    |
| <i>Ilyocypris</i> sp.          |       |      |      |      | o   | x    |
| <i>Scottia browniana</i>       |       |      |      |      |     | x    |
| Molluscs                       |       | x    |      | x    | x   | x    |
| <i>Bithynia opercula</i>       |       |      |      |      |     | x    |
| Plant debris                   |       |      | x    | x    | x   | x    |
| <i>Azolla</i>                  | x     |      |      |      |     |      |
| <i>Chara oogonia</i>           |       |      |      |      |     | x    |
| Small mammal teeth             |       |      |      |      | x   |      |
| Fish remains                   |       |      |      |      | x   | x    |
| Rhizoliths                     | x     |      | x    |      |     |      |
